# Supplementary material
Source: PubMed Central journal article supplement (PMC10859123)

Data Supplement: Additional Shared Pathomechanism Graphs  
 Regulation of cytokine production

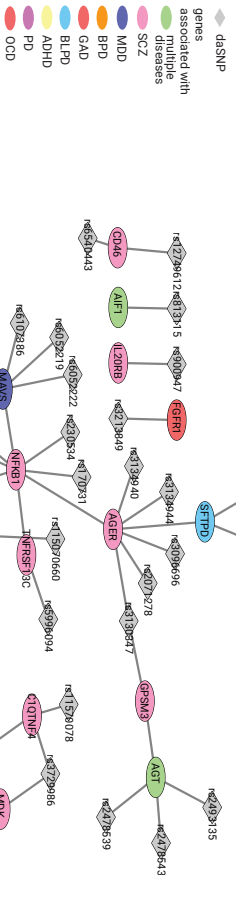

**B**

Sleep Issues

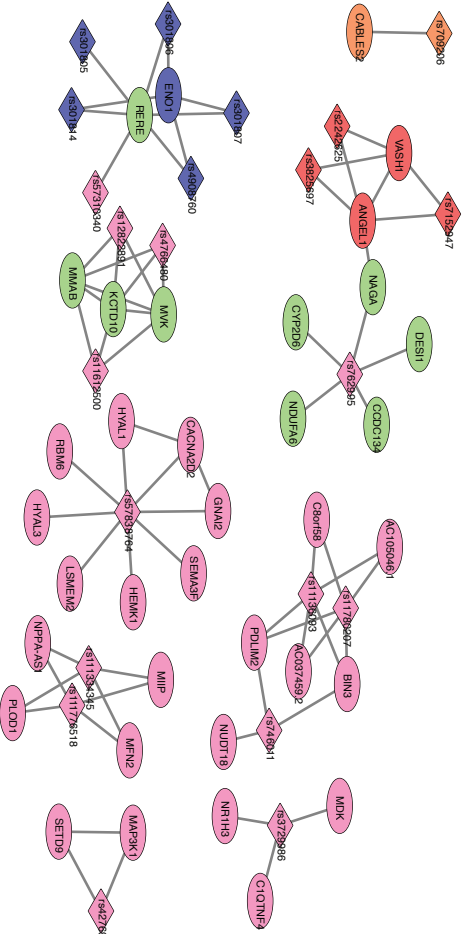

**C**

Anhedonia

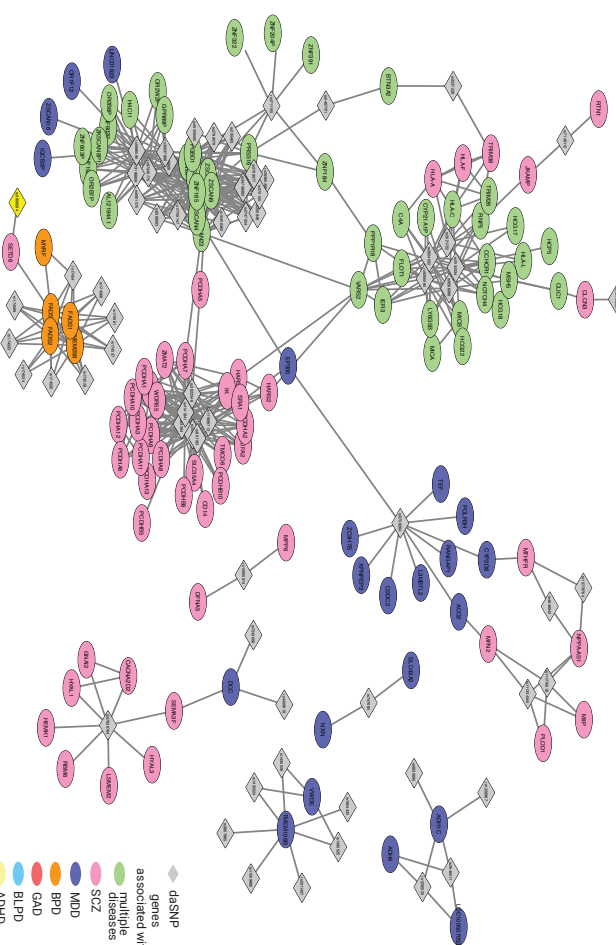

**D**

Irritability

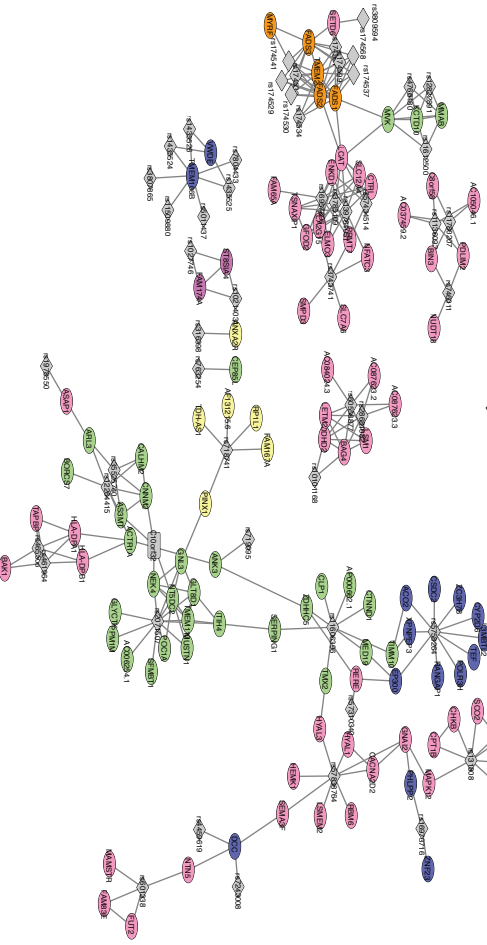

Supplement: NIHMS1955441-supplement-S4_Additional_Shared_Pathomechanism_Graphs.pdf [file NIHMS1955441-supplement-S4_Additional_Shared_Pathomechanism_Graphs.pdf]
