# Supplementary material
Source: PubMed Central journal article supplement (PMC10859123)
Supplement: NIHMS1955441-supplement-Supplemental_Information.pdf [file NIHMS1955441-supplement-Supplemental_Information.pdf]

# 1 **Supplementary Materials**

## 2 **Table of Contents**

|    |                                                                              |    |
|----|------------------------------------------------------------------------------|----|
| 3  | <i>Supplementary Methods</i> .....                                           | 3  |
| 4  | MPRA library cloning .....                                                   | 3  |
| 5  | MPRA library virus generation .....                                          | 3  |
| 6  | General MPRA cell culture and infection .....                                | 3  |
| 7  | Infection and Culture of Astrocytes for Psych MPRA .....                     | 4  |
| 8  | Infection and Culture of Cell Lines for Psych MPRA .....                     | 4  |
| 9  | MPRAnalyze Model .....                                                       | 5  |
| 10 | Power Analysis .....                                                         | 7  |
| 11 | Luciferase plasmid-based assays .....                                        | 7  |
| 12 | Luciferase lentiviral-based assays .....                                     | 8  |
| 13 | Epigenomic data generation and processing .....                              | 8  |
| 14 | RNA-seq data generation and primary processing.....                          | 8  |
| 15 | RNA-seq differential analysis .....                                          | 9  |
| 16 | Fast-ATAC sequencing data generation and primary processing.....             | 9  |
| 17 | Differential ATAC peak analysis .....                                        | 10 |
| 18 | HiChIP data generation and primary processing.....                           | 10 |
| 19 | HiChIP differential analysis .....                                           | 11 |
| 20 | Virtual 4C plot generation.....                                              | 11 |
| 21 | Track plot generation.....                                                   | 12 |
| 22 | General Analysis of epigenomics data .....                                   | 12 |
| 23 | Fast-ATAC sequencing data generation and primary processing.....             | 13 |
| 24 | MotifBreakR analysis .....                                                   | 13 |
| 25 | Activity-by-Contact model to predict SNV-gene targets .....                  | 14 |
| 26 | Allele specific analysis.....                                                | 14 |
| 27 | Therapeutic analysis .....                                                   | 15 |
| 28 | Colocalization of GTEx eQTLs and intersection with MPRA results .....        | 16 |
| 29 | VA cohort analysis of serum magnesium levels in chronic kidney disease ..... | 16 |
| 30 | <i>Lead Contacts</i> .....                                                   | 17 |

|    |                                                                                                         |    |
|----|---------------------------------------------------------------------------------------------------------|----|
| 31 | <i>Extended Figure Legends</i> .....                                                                    | 17 |
| 32 | <i>Supplementary Tables</i> .....                                                                       | 20 |
| 33 | <b>Table S1. Data Summary</b> .....                                                                     | 20 |
| 34 | <b>Table S2. Comparison to External Variant Prediction</b> .....                                        | 20 |
| 35 | <b>Table S3. Comparison to External ATAC</b> .....                                                      | 20 |
| 36 | <b>Table S4 Comparison to External Looping Data</b> .....                                               | 20 |
| 37 | <b>Table S5. GWAS enrichment odds ratio of daSNVs in cell-type specific ATAC and HiChIP regions ...</b> | 20 |
| 38 | <b>Table S6. SNP-Motif analysis summary table</b> .....                                                 | 20 |
| 39 | <b>Table S7. Luciferase assay results</b> .....                                                         | 20 |
| 40 | <b>Table S8. Colocalization analyses of MPRA hits with GTEx</b> .....                                   | 21 |
| 41 | <b>Table S9. BrainMap (single cell cortical brain data) Annotation for gene linked to daSNVs</b> .....  | 21 |
| 42 | <b>Table S10. SCZ disease genes linked to protein coding variants and daSNVs</b> .....                  | 21 |
| 43 | <b>Table S11. Psychiatric genes druggability prioritization table</b> .....                             | 22 |
| 44 | <b>Table S12. 58 CNS-relevant monogenic diseases and their genes linked by OMIM</b> .....               | 22 |
| 45 | <b>Table S13. RNA-seq TPM values for all tissues</b> .....                                              | 22 |
| 46 | <b>Table S14. 806 Psychiatric codes in the UK Biobank for which GWAS summary statistics were</b>        |    |
| 47 | <b>extracted</b> .....                                                                                  | 23 |
| 48 | <b>Table S15. Primers</b> .....                                                                         | 23 |
| 49 | <i>Supplementary Data Descriptions</i> .....                                                            | 24 |
| 50 | <b>Data S1. (separate file) LDSC Analysis for Heritability</b> .....                                    | 24 |
| 51 | <b>Data S2. (separate file) Literature-derived da-SNV Gene Annotations</b> .....                        | 24 |
| 52 | <b>Data S3. (separate file) daSNV Summary statistics and annotations table</b> .....                    | 24 |
| 53 | <b>Data S4. (separate file) Networks of shared putative pathomechanisms in neuropsychiatric</b>         |    |
| 54 | <b>disorders.</b> .....                                                                                 | 24 |
| 55 | <b>Data S5. (separate file) MPRA cell-condition-specific summary statistics</b> .....                   | 24 |
| 56 | <i>Bibliography</i> .....                                                                               | 25 |
| 57 |                                                                                                         |    |

## 58 **Supplementary Methods**

59

### 60 **MPRA library cloning**

61 Resuspended oligo pool (10pg/ $\mu$ l) was amplified using PrimeSTAR Max DNA  
62 Polymerase (Takara # R045A) with MPRA cloning forward primer and reverse primer to  
63 introduce the EcoRI and BamHI restriction sites upstream and downstream of the oligo,  
64 respectively. The amplified library was digested with EcoRI and BamHI, ligated into a  
65 pGreenFire vector (Addgene, #174103) with a blastocidin selection marker at a 1:2 vector:insert  
66 ratio, transformed into Stellar Competent cells (Takara #636763) in 40 parallel reactions,  
67 recovered overnight for 12 hours, and pooled. The expanded library was isolated by the Qiagen  
68 Plasmid Plus Maxi kit. We generated a miniP-miniLuc amplicated by PCR from plasmid pD2  
69 (Addgene, #174105) digested both the miniP-miniLuc insert and the plasmid library with XhoI  
70 and XbaI (excising the filler region), ligating at a 1:8 vector:insert ratio, transformed into Stellar  
71 Competent cells (Takara # 636763) in parallel reactions, recovered overnight for 12 hours,  
72 pooled. This second step library isolated again by Qiagen Plasmid Plus Maxi kit. Multiple  
73 iterations of the cloning process were done and pooled to form the final plasmid library.

74

### 75 **MPRA library virus generation**

76 LentiX cells (passage < P8) were grown in 15cm plates until ~80% confluent. Plasmids  
77 pCMV R d8.91 (25 ug/plate), pUC-MDG VSVG (10 ug/plate), and the plasmid library (25  
78 ug/plate) were transfected using Lipofectamine 2000 (Life Technologies). Supernatant was  
79 harvested 48 and 72 hours post transfection. GoStiX LentiX sticks were used to rapidly assess  
80 transfection efficacy (p24 reading >300). Supernatant was concentrated using LentiX  
81 concentrator (Takara) at a 3:1 vol:vol ratio of supernatant: concentrator, then aliquoted and  
82 frozen down to -80C.

83

### 84 **General MPRA cell culture and infection**

85 In each cell type, optimal blastocidin concentration was determined, and virus was  
86 titrated using CellTiterBlue assays to minimize virus toxicity and maximize infection efficiency.  
87 Additionally, average integrants per cell was determined for infected cells. Briefly, gDNA was

88 extracted from infected cells post-selection via Qiagen tissue extraction kits. Serial dilutions of  
89 the original plasmid library and the gDNA were performed. qPCR was performed on all serial  
90 dilutions using primers designed for the oligo library sequences to determine the number of  
91 copies of the integrants present in each gDNA sample, using the formula:  $\log_{10}(\text{copies}) =$   
92  $\text{PLASMID\_INTERCEPT} * C_q + \text{PLASMID\_SLOPE}$ . Cell number for each gDNA sample was  
93 approximated based on the assumption that there is roughly 6.6 pg of gDNA per cell. The  
94 average integrants per cell was calculated by dividing the number of copies present in a gDNA  
95 sample by the number of estimated cells. Average number of integrants per cells greater than 4  
96 were desired.

97

#### 98 Infection and Culture of Astrocytes for Psych MPRA

99 Normal Human Astrocytes (Lonza, CC-2565) were cultured in Lonza Astrocyte Growth Media  
100 containing astrocyte basal medium, 7.5% FBS, ascorbic acid, rhEGF, GA-1000 (gentamicin  
101 sulfate-amphotericin), insulin, and L-glutamine. Astrocytes were seeded at a 5,000 cells/cm<sup>2</sup>  
102 density and maintained up to 70% confluence before splitting at 37C and 5% CO<sub>2</sub>. Growth  
103 medium was changed the day after seeding and every other day thereafter. For each biological  
104 replicate, roughly  $1.5 \times 10^7$  cells were infected with the MPRA library using 8 ug/ml polybrene,  
105 selected for 24 hrs post-infection with 30 ug/ml blastocidin for 48 hrs, and grown until  
106  $\sim 1.2 \times 10^7$  cells were collected, washed, and frozen at -80C.

107

#### 108 Infection and Culture of Cell Lines for Psych MPRA

109 HEK293T (Takara, cat. no. 632180) cells were cultured in DMEM (Thermo Fisher  
110 Scientific cat. no. 11995065) supplemented with 10% FBS and 1X Penicillin-Streptomycin  
111 (Thermo Fisher Scientific cat. no. 15140122) at 37°C with 5% CO<sub>2</sub>. Cell were lifted using 0.05%  
112 trypsin (Thermo Fisher Scientific cat. no. 25300054) and passaged 1:10 once they reached 80-  
113 90% confluence.

114 SH-SY5Y neuroblastoma cells (ATCC, CRL-2266) were grown in 1:1 F12 (Lonza, cat.  
115 no. 12-615F): EMEM (Thermo Fisher Scientific cat. no. 50-188-268FP). SH-SY5Y cells were  
116 differentiated in Neurobasal medium (Thermo Fisher no 21103049) with B27 (Thermo Fisher no  
117 17504044) and Glutamax (Thermo Fisher no 35050061) supplements and 10 μM all-trans-

118 retinoic acid (ATRA) according to the published protocol<sup>1</sup>. Half-media changes were made every  
119 day for 6 days.

120 IMR-32 neuroblastoma cells (ATCC, CCL-127) were grown in EMEM media. IMR-32  
121 cells were differentiated by adding 1 mM dibutyryl-cAMP (Fisher: Stem Cell Technologies cat.  
122 no. 73884) and 2.5  $\mu$ M BrdU (Fisher Scientific cat. no. B23151) in EMEM for 6 days. A full  
123 media change was done on day 3.

124 D283 medulloblastoma cells (ATCC, HTB-185) were grown in EMEM media in  
125 suspension. D341 medulloblastoma cells (ATCC, HTB-187) were grown in suspension in  
126 EMEM media supplemented with 20% FBS.

127 MPRA sample culture and processing for each cell line was done in parallel.

128 To perform the MPRA in cell lines, an MPRA lentiviral library titration was performed to  
129 determine the volume of concentrated lentivirus needed to achieve a high infection rate without  
130 negatively affecting cell growth. Titration was also performed to test the optimal concentration  
131 of blasticidin S HCl needed for a 48 hour selection. For each sample, 10 million cells were  
132 transduced with 700 $\mu$ L of the MPRA lentiviral library and 5  $\mu$ g/mL polybrene. Cells were plated  
133 into two 10cm plates (5 million cells/plate) and cultured overnight. Approximately 24 hours post  
134 transduction, cells were lifted and plated into two 15cm plates in media supplemented with  
135 blasticidin S HCl. Non-transduced cells were fully selected within 48 hours. After 72 hours of  
136 drug selection, cells were collected and lysed in Qiagen buffer RLT Plus containing 2-  
137 mercaptoethanol. Transductions were performed in triplicate. Lysates were frozen at -80°C prior  
138 to performing RNA isolation using a Qiagen RNeasy Plus Mini Kit (Qiagen cat. no. 74136).

139

140

#### 141 MPRAnalyze Model

142 SNVs with significant allele specific activity were determined per cell type using the R  
143 package MPRAnalyze<sup>2</sup> v1.4.0, which assumes a linear relationship between RNA and DNA  
144 (RNA =  $\alpha$  DNA), where  $\alpha$  represents a transcription rate. RNA counts ( $r$ ) are approximated as a  
145 negative binomial distribution, and DNA counts ( $d$ ) are fit to an underlying gamma distribution.  
146 We note that DNA plasmid library counts were used as baseline. Both DNA and RNA  
147 abundances are modelled via separate log-additive regression models. DNA is modelled with a  
148 design matrix ( $X_d$ ) encoding a barcode-allele coefficient that assumes barcode and allelic

149 (reference or alternate) effects independently contribute to oligo abundance. This allows a per-  
 150 barcode and a per-allele estimation of DNA counts. RNA design matrix ( $X_r$ ) includes a factor for  
 151 the allele term only and was designed such that coefficients represent effects of the reference and  
 152 alternate condition. Additionally, for controls we used sequences of both reference and alternate  
 153 alleles (n=11 loci) that virtually no activity across all conditions, replicates, barcodes, and tissues  
 154 as our background for transcriptional activity. In equation form, we represent the DNA model as:

$$155 \quad \log(\mathbf{d}) = X_d \boldsymbol{\beta}$$

156 where  $\boldsymbol{\beta}$  is the DNA model coefficient and  $X_d \sim$  barcode\_allele.

157 The full RNA model is then:

$$158 \quad \log(\mathbf{r}) = \log(\mathbf{d}) + \log(\alpha)$$

$$159 \quad \log(\mathbf{r}) = X_d \boldsymbol{\beta} + \log(\alpha) = X_d \boldsymbol{\beta} + X_r \boldsymbol{\gamma}$$

160 where  $\boldsymbol{\gamma}$  is the RNA model coefficient and  $X_r \sim$  allele specific co-efficient. We note that  
 161 replicates were normalized prior to fitting to avoid batch-specific effects.

162 In words, we model the full model of the allele-specificity model to be:

$$163 \quad \text{RNA} \sim \text{replicate} + \text{allele}$$

164 The reduced model (intercept-only only):

$$165 \quad \text{RNA} \sim \text{replicate}$$

166 and models the null hypothesis which states that there is no allelic imbalance between the  
 167 reference or alternate allelic condition.

168 Likelihood maximization was used to fit these full generalized linear models (GLM) to  
 169 extract fitted coefficients for  $\boldsymbol{\beta}$ ,  $\boldsymbol{\gamma}$ , and thereby  $\alpha$ .  $\alpha$  value corresponds to the transcriptional rate  
 170 of the allelic element. Log2-fold change represents the log-transcriptional activity changes  
 171 between alternative and reference allele sequences. A one-sided likelihood ratio test, within the  
 172 MPRAnalyze package, is used to extract p-values by comparing the full model to the reduced  
 173 model. P-values are multiple-hypothesis corrected using the R function p.adjust, method=fdr.

174 SNVs with allele specific activity were defined as those achieve a  $|\log_2(\text{fold-change})| >$   
 175 0.05 and an FDR-corrected p-value  $< 0.05$ . Empiric p-values were plotted as a QQ-plot against  
 176 expected p-values (given a uniform distribution between [0,1]).

177 Likewise, a similar GLM model can be built assessing cell-type specificity where the full  
 178 model:

$$179 \quad \text{RNA} \sim \text{replicate} + \text{allele} + \text{tissue} + \text{allele:tissue}$$

180 Whereas the reduced model would be:

181 
$$\text{Batch-normed RNA} \sim \text{replicate} + \text{allele} + \text{tissue}$$

182 This likelihood ratio test (FDR<0.05) was then used to assess the null hypothesis that tissue and  
183 allelic effects on RNA activity are independent from one another. This LRT was used to assess  
184 whether there were tissue-specific effects that were loci dependent.

185

### 186 Power Analysis

187 We used the simulateMPRA function in the MPRAalyze package to perform a power analysis  
188 to determine how many barcodes are necessary for detection of a given level of fold change  
189 (allelic effect size). We generate the dispersion metrics for the simulated dataset by extracting  
190 fitted parameters from our own MPRA dataset. We tested power for at 4 different log2-fold  
191 change thresholds (1.2, 1.5, 2, 3), for a total of 20 variants, simulated 5 times with 5, 10, 20, 50,  
192 and 100 barcodes each. Results are shown in fig S1D.

193

### 194 Luciferase plasmid-based assays

195 401 bp fragments were designed for selected SNVs of interest, by extracting the genomic  
196 sequence (hg19) centered around the SNV of interest. Sequences were selected based on their  
197 linked eGenes of interest, MPRA significance at multiple time points, and magnitude of the  
198 alternate-to-reference log fold change. Luciferase Cloning adaptors were added upstream and  
199 downstream of the genomic instance, respectively. Sequences were synthesized as GeneBlocks  
200 (IDT). Fragments were cloned into a pGL4. 23 using In-Fusion Snap Assembly (TAKARA Cat  
201 638943). Plasmid sequences were confirmed by Sanger sequencing and then transfected in SH-  
202 SY5Y cells with 4 number of replicates per sequence. Cells were harvested after 48 hours.  
203 Luciferase signal was measured using the Dual-Luciferase® Reporter Assay System (Promega)  
204 using Tecan Infinite M1000. Luciferase signal was calculated following manufacturing  
205 specifications. Briefly, firefly and Renilla blanks were subtracted for respective measurements.  
206 The firefly to Renilla ratio was calculated for all alternate and reference measurements, then  
207 normalized to the control empty vector ratio. Normalized ratios less than 1 were removed (n=10  
208 daSNVs), as those sequences did not transfect well in the chosen cell system. p-values were  
209 calculated using the two-sided Mann-Whitney u-test.

210

### 211 Luciferase lentiviral-based assays

212 A lentiviral reporter construct was designed that contains a minimal promoter driving the  
213 expression of destabilized copGFP and luciferase separated by a T2A sequence. The construct  
214 also contains a CMV driven blasticidin S deaminase gene. Genomic sequences synthesized by  
215 IDT were inserted upstream of the minimal promoter by digestion of the vector with NheI,  
216 followed by a Gibson assembly using NEBuilder. Constructs were Sanger sequenced to confirm  
217 correct cloning. Lentivirus was made as described above and concentrated 50X. 300,000 SH-  
218 SY5Y cells were transduced with 10uL of concentrated lentivirus in media containing 5ug/mL  
219 polybrene and seeded in 6-well plates. 2 days after transduction, cells were treated with media  
220 containing 15ug/mL blasticidin HCl and selected for at least 3 days until the non-transduced cells  
221 were died. Lysate was collected in 1X PLB (Promega) and stored at -80°C prior to performing  
222 the luciferase assay. Genomic DNA was also isolated to determine lentiviral integration copy  
223 number for luciferase signal normalization. Luciferase assays were performed using a Tecan  
224 Infinite M1000 plate reader. Relative luciferase units (RLU) were normalized by both genomic  
225 lentiviral copy number and cell lysate. To determine lentiviral copy number, a qPCR was  
226 performed using primers that amplify part of the luciferase gene. A standard curve was obtained  
227 using a plasmid dilution series. Genomic DNA input was normalized using primers to the intron  
228 of WPRE. Cell lysate concentrations were determined using a Pierce Microplate BCA Protein  
229 Assay Kit – Reducing Agent Compatible (Thermo Fisher Scientific).

230

### 231 Epigenomic data generation and processing

#### 232 RNA-seq data generation and primary processing

233 RNA-seq on the neuronal samples was performed as such. Total RNA was collected  
234 using Trizol (Invitrogen) followed by cleanup using RNA Clean and Concentrator (Zymo) using  
235 the manufacturer's protocol. Samples were then QCed using bioanalyzer and subjected to paired  
236 end sequencing (BGI platform).

237 RNA-seq on Astrocyte biological replicates was performed using the Lexogen Quant-seq  
238 3' mRNA-seq Library Prep Kit FWD for Illumina protocol (cat# 015.96). Briefly, mRNA was  
239 isolated and reverse transcribed from 500 ng of total RNA. Double-stranded cDNA was  
240 synthesized and i7 adapters for Illumina sequencing were added during PCR amplification.

241 RNA-seq libraries were sequenced on an Illumina HiSeq 4000 instrument at a depth of 30  
242 million reads per sample.

243 RNA-seq data from HEK293T cells were processed from the raw read data from Aktas,  
244 et al 2017<sup>3</sup>, (SRR3997504-7).

245 Once reads were sequenced or extracted, single end reads were mapped to the hg19  
246 reference genome with GRCh37 Ensembl annotations using STAR aligner (version 2.5.4b)<sup>4</sup>  
247 using default parameters. Sample expression counts and transcripts per million (TPM) values  
248 were generated using RSEM (version 1.3.0)<sup>5</sup> and default parameters. Conversion between  
249 Ensembl IDs and HGNC symbols was performed using the biothings api client  
250 (<https://biothings.io/>) python package v0.2.6. Cell type-specific genes were defined as genes  
251 expressed at a TPM>1 across both biological replicates in a single cell type and at a TPM <1 in  
252 all other cell types.

253

#### 254 RNA-seq differential analysis

255 Tximport<sup>6</sup> v1.14.0 R package was used to import RSEM counts (see section “RNA-seq data  
256 generation and primary processing”) into R environment, and R package DeSeq<sup>7</sup> v1.26.0 was  
257 used to call differentially expressed genes. Finally, differential gene TPM values were visualized  
258 in heatmaps using the R package pheatmap v.10.12<sup>8</sup>. GO term enrichment for different cell-types  
259 was determined via clusterProfiler<sup>9</sup> v.3.14.0. GO<sup>10,11</sup>, Reactome<sup>12</sup>, and MSigDB<sup>13,14</sup> genesets  
260 were utilized in this analysis.

261

#### 262 Fast-ATAC sequencing data generation and primary processing

263 Fast-ATAC sequencing on astrocyte biological replicates was performed as previously  
264 described<sup>15</sup>. Briefly, 55,000 viable cells were lysed with digitonin as a detergent and pelleted by  
265 centrifugation at 500 g force for 5 minutes at 4C. The nuclei pellet was resuspended in 50 uL of  
266 transposase mixture (25 uL 2x TD buffer, 2.5 uL of TDE1, 16.5 uL PBS, 0.5 uL 1% digitonin,  
267 0.5 uL 10% Tween-20, 5 uL nuclease-free water). Transposition reactions were incubated at  
268 37°C for 30 minutes in an Eppendorf ThermoMixer with agitation at 1000 RPM. Transposed  
269 DNA was purified using a Zymo DNA Clean and Concentrator-5 Kit (cat# D4014) and purified  
270 DNA was eluted in 20 ul elution buffer (10 mM Tris-HCl, pH 8). Transposed fragments were  
271 amplified and purified, in accordance to published protocols<sup>16</sup> with modified primers<sup>17</sup>. Libraries

272 were quantified using qPCR prior to sequencing. All Fast-ATAC libraries were sequenced using  
273 paired-end, dual-index sequencing on an Illumina HiSeq 4000 at a depth of 50 million reads per  
274 sample.

275 ATAC-seq read alignment, quality filtering, duplicate removal, transposase shifting, peak  
276 calling, and signal generation were all performed through the ENCODE ATAC-seq pipeline  
277 (<https://github.com/ENCODE-DCC/atac-seq-pipeline>). Briefly, adapter sequences were trimmed,  
278 sequences were mapped to the hg19 reference genome using Bowtie2<sup>18</sup> v2.3.4.1 (-X2000), poor  
279 quality reads were removed, PCR duplicates were removed (Picard Tools<sup>19</sup> v2.24.0  
280 MarkDuplicates), chrM reads were removed, and read ends were shifted +4 on the positive  
281 strand or -5 on the negative strand to produce a set of filtered high-quality reads. These reads  
282 were put through MACS2<sup>20</sup> v2.1.1 to get peak calls and signal files. Finally, IDR analysis was  
283 run on the two replicate peak files to produce an IDR peak file that is the reproducible set of  
284 peaks across both replicates. The full pipeline can be found on the ENCODE portal.

285

#### 286 Differential ATAC peak analysis

287 ATAC seq peaks were processed for differential expression using a pipeline described  
288 here<sup>21</sup> with modifications. R package DeSeq2<sup>7</sup> was used to determine differential counts in  
289 ATAC peaks. Briefly, consensus peak regions were established using the R package  
290 GenomicRanges (v1.48.0), then the number of ATAC peaks in these peak regions was  
291 determined using R package Rsubread (v2.0.0). R package pheatmap was used to plot  
292 differential ATAC peaks by cell-type. Additionally, R package ChIPseeker<sup>22</sup> v1.22.0 was used to  
293 annotate ATAC peaks were nearest genes for GO term enrichment.

294

#### 295 HiChIP data generation and primary processing

296 The HiChIP protocol was performed for Astrocytes, ESC cells, N-D2, N-D4, N-D10, and N-D28  
297 as previously described<sup>23</sup> using antibody H3K27ac (Abcam, ab4729) at 1ug/ul with the following  
298 modifications. Samples were sheared using a Covaris E220 using the following parameters: Fill  
299 Level = 10, Duty Cycle = 5, PIP = 140, Cycles/Burst = 200, Time = 4 minutes and then clarified  
300 by centrifugation for 15 minutes at 16100 g force at 4° C. H3K27ac antibody was diluted as  
301 such: 10X volume of ChIP Dilution Buffer (0.01% SDS, 1.1% Triton X-100, 1.2 mM EDTA,  
302 16.7 mM NaCl, water) was added to 4 ug of H3K27ac antibody, and chromatin was incubated

303 overnight. The chromatin-antibody complex was captured with 34 uL Protein A beads (Thermo  
304 Fisher). Qubit quantification following ChIP ranged from 125-150 ng. The amount of Tn5 used  
305 and number of PCR cycles performed were based on the post-ChIP Qubit amounts, as previously  
306 described<sup>23</sup>.

307 HiChIP samples were size selected by PAGE purification (300-700 bp) for effective  
308 paired-end tag mapping and where therefore removed of all primer contamination. All libraries  
309 were sequenced on the Illumina NovaSeq 6000 instrument to an average read depth of 300  
310 million total reads.

311 HiChIP paired-end reads were aligned to the hg19 genome using the HiC-Pro pipeline<sup>24</sup>  
312 v2.11.1. Default settings were used to remove duplicate reads, assign reads to MboI restriction  
313 fragments, filter for valid interactions, and generate binned interaction matrices. HiC-Pro filtered  
314 reads were then processed using hichipper<sup>25</sup> v0.7.0 using the {EACH, ALL} settings to call  
315 HiChIP peaks in MboI restriction fragments. HiC-Pro valid interaction pairs and hichipper  
316 HiChIP peaks were then processed using FitHiChIP<sup>26</sup> v7.0.0 to call significant chromatin  
317 contacts using the default settings except for the following: MappSize=500, IntType=3,  
318 BINSIZE=5000, QVALUE=0.01, UseP2PBackgrnd=0, Draw=1, TimeProf=1.

319

### 320 HiChIP differential analysis

321 Differential loop analysis was done using the R package diffloop<sup>27</sup> (v1.10.0). First, a loop object  
322 or matrix was created with each row representing a loop (two 5kb DNA segments that are linked  
323 together in *cis*- formation) and each column representing a cell replicate. Values are the number  
324 of reads counted per loop rows as loops, columns as cell type samples and values as the number  
325 of read counts part of the loop. Differential loops are called using limma v3.42.0, similar to how  
326 differential RNAseq analysis. Heatmap of results is plotted using R package pheatmap v1.0.12,  
327 and the R function “scale” was used to Z-score by column (cell type).

328

### 329 Virtual 4C plot generation

330 Virtual 4C plots were generated to depict looping relationships extracted from HiChIP  
331 centered on a chosen 5kb region, typically containing the TSS of a gene of interest or the SNV of  
332 interest for gene and SNV-centric approaches, respectively. First, a bed file is made from the  
333 \*.abs.bed and \*.matrix output files from HiCPro (v.2.11.1) to derive a count matrix of

334 interactions between 5kB bins. Counts were normalized by the number of validate pairs reported  
335 by HiC-Pro for each cell type. Interaction frequency is then plotted in R for all samples of  
336 interest.

337

#### 338 Track plot generation

339 Tracks are plotted in WashU Epigenome Browser (<https://epigenomegateway.wustl.edu/>).  
340 Tracks were made using hg19 reference genome. Gene marker tracks were extracted from UCSC  
341 browser (<https://genome.ucsc.edu/>). HiChIP loops were displayed as ‘longrange’ tracks extracted  
342 from an overlay of both HiCPro bed files and FitHiChIP bed files. Each purple arc represents  
343 one loop. ATAC peaks were displayed in ‘bigwig’ file format where the peak height on the track  
344 corresponds to a normalized read frequency at a given genomic region. MPRA tracks were  
345 generated by creating bigwig files containing peaks at the genomic location of the daSNVs,  
346 where height of the peak corresponds to the absolute value of the  $\log_2(\text{fold-change})$  of alternate  
347 over reference allele.

348

#### 349 General Analysis of epigenomics data

350 Reference genome hg19 and GENCODE v19<sup>28</sup> were used. Conversions of ENSEMBL<sup>29</sup>  
351 ids to gene symbols were doing using python package biothings v0.2.6<sup>30</sup>. For transcription  
352 factors and motifs, the HOCOMOCO v11<sup>31</sup> database were used. Heatmaps were made using  
353 pheatmap v1.0.12.

354

355

356

357 Fast-ATAC sequencing data generation and primary processing

358 Fast-ATAC sequencing on astrocyte biological replicates was performed as previously  
359 described<sup>15</sup>. Briefly, 55,000 viable cells were lysed with digitonin as a detergent and pelleted by  
360 centrifugation at 500 g force for 5 minutes at 4C. The nuclei pellet was resuspended in 50 uL of  
361 transposase mixture (25 uL 2x TD buffer, 2.5 uL of TDE1, 16.5 uL PBS, 0.5 uL 1% digitonin,  
362 0.5 uL 10% Tween-20, 5 uL nuclease-free water). Transposition reactions were incubated at  
363 37°C for 30 minutes in an Eppendorf ThermoMixer with agitation at 1000 RPM. Transposed  
364 DNA was purified using a Zymo DNA Clean and Concentrator-5 Kit (cat# D4014) and purified  
365 DNA was eluted in 20 ul elution buffer (10 mM Tris-HCl, pH 8). Transposed fragments were  
366 amplified and purified, in accordance to published protocols<sup>16</sup> with modified primers<sup>17</sup>. Libraries  
367 were quantified using qPCR prior to sequencing. All Fast-ATAC libraries were sequenced using  
368 paired-end, dual-index sequencing on an Illumina HiSeq 4000 at a depth of 50 million reads per  
369 sample.

370 ATAC-seq read alignment, quality filtering, duplicate removal, transposase shifting, peak  
371 calling, and signal generation were all performed through the ENCODE ATAC-seq pipeline  
372 (<https://github.com/ENCODE-DCC/atac-seq-pipeline>). Briefly, adapter sequences were trimmed,  
373 sequences were mapped to the hg19 reference genome using Bowtie2<sup>18</sup> v2.3.4.1 (-X2000), poor  
374 quality reads were removed, PCR duplicates were removed (Picard Tools<sup>19</sup> v2.24.0  
375 MarkDuplicates), chrM reads were removed, and read ends were shifted +4 on the positive  
376 strand or -5 on the negative strand to produce a set of filtered high-quality reads. These reads  
377 were put through MACS2<sup>20</sup> v2.1.1 to get peak calls and signal files. Finally, IDR analysis was  
378 run on the two replicate peak files to produce an IDR peak file that is the reproducible set of  
379 peaks across both replicates. The full pipeline can be found on the ENCODE portal.

380

381 MotifBreakR analysis

382 R package MotifBreakR<sup>32</sup> v.2.10.2 was used to determine the identity of motifs broken or gained  
383 by a SNV and magnitude of the allele change. daSNVs were mapped to rsIDs using  
384 SNVlocs.Hsapiens.dbSNV142.GRCh37. The HOCOMOCO database was used as a reference for  
385 motif PWM (position-weight matrices). A “broken motif” indicates the SNP of interest has a  
386 lower match score to the PWM when using the alternate allele versus when using the reference

387 allele. A “gained” motif indicates the opposite. Histograms and density plots were generated  
388 using ggplot2. daSNVs were tested for enrichment of broken/gained motifs using a  
389 hypergeometric test. Heatmap showing normalized enrichment scores from the hypergeometric  
390 test across different neuropsychiatric diseases were shown. Results are shown in **Extended Data**  
391 **Fig. 2F, table S6B.**

392

### 393 Activity-by-Contact model to predict SNV-gene targets

394 The Activity-by-Contact model<sup>33</sup> ([https://github.com/broadinstitute/ABC-Enhancer-](https://github.com/broadinstitute/ABC-Enhancer-Gene-Prediction)  
395 [Gene-Prediction](https://github.com/broadinstitute/ABC-Enhancer-Gene-Prediction) v0.2.0) was used as an orthogonal means to predict SNV-gene targets. The  
396 process was followed as described<sup>34</sup>. Briefly, candidate regions, or putative enhancer elements  
397 were defined by ATAC-seq peaks previously called. Activity, or the number of ATAC-seq reads  
398 in these candidate regions, was quantified, and gene body regions were defined via Gencode.v19  
399 annotations. ABC scored were computed by combining activity and contact, defined by  
400 FitHiChIP loops, for each cell type. The element-gene prediction pairs were used to assign ABC-  
401 predicted target genes to each daSNV. Results are listed for the daSNVs in the column  
402 `abc_genes` in **Data S3**.

403

### 404 Allele specific analysis

405 Allele specific for HiChIP and ATAC was performed as described in<sup>35</sup> and in accordance  
406 with pipelines described by GATK<sup>36</sup> (<https://gatk.broadinstitute.org/hc/en-us>) v4.1.9.0. Briefly,  
407 allele-specific bam files were generated from the initial using the bwa package. Picard<sup>19</sup> v2.24.0  
408 was used to build bam indices, remove duplicates, and sort the resulting bam file. GATK  
409 BaseRecalibrator was called to generate a recalibration table based on covariates extracted from  
410 known SNV sites (dbSNV\_138.hg19, 1000G\_phase1.snps.high\_confidence.hg19,  
411 1000G\_phase1.indels.hg19, and Mills\_and\_1000\_gold\_standard.indels.hg19). A collated list of  
412 all loop regions and all ATAC peaks were collated for asHiChIP and asATAC analysis,  
413 respectively, and used to focus analysis on regions of interest. The base quality score  
414 recalibration table was applied to the SNVs using the ApplyBQSR command. HaplotypeCaller  
415 was using to generate an allele specific vcf file per sample. Samples were aggregated using the  
416 CombineGVCFs command, and genotypes using GentyeVCFs to create the raw overall SNV  
417 vcf. Variant recalibration was called with the following parameters:

```

418     --resource:hapmap,known=false,training=true,truth=true,prior=15.0
419     ${refSNV_path}/hapmap_3.3.hg19.sites.vcf \
420     --resource:omni,known=false,training=true,truth=false,prior=12.0
421     ${refSNV_path}/1000G_omni2.5.hg19.sites.vcf \
422     --resource:1000G,known=false,training=true,truth=false,prior=10.0
423     ${refSNV_path}/1000G_phase1.snps.high_confidence.hg19.sites.vcf \
424     --resource:dbsnp,known=true,training=false,truth=false,prior=2.0
425     ${refSNV_path}/dbsnp_138.hg19.vcf \
426     -an DP -an QD -an FS -an SOR -an MQ -an ReadPosRankSum \
427     -tranche 100.0 -tranche 99.9 -tranche 99.0 -tranche 90.0 \
428     -mode SNV

```

429 Finally, ApplyVQSR was used to generate the final, unfiltered SNV vcf file. vcf files  
430 were filtered for SNV locations where a depth count (DP)  $\geq 10$ , alleles with only biallelic SNV  
431 sites (GT:0/1), and a minimum reference or alternative allele count (AD)  $\geq 2$ . A binomial test  
432 was used to determine if the reference allele count was significantly different from the alternate  
433 allele count, and p-values were FDR corrected based on the total number of qualified SNPs  
434 based on the DP, GT, and AD filtering. An FDR-corrected binomial p-value threshold of 0.05  
435 was used to determine allele specificity. Hypergeometric tests were performed to determine  
436 whether MPRA daSNVs were enriched for asATAC or asHiChIP sites per tissue, using a  
437 background of possible MPRA tested SNPs that were called as heterozygous SNP post DP, GT,  
438 and AD filtering.

439 Density plots depicting allele-specific epigenomic signal were generated by counting  
440 reads within 150bp up or downstream of SNV of interest for the reference and alternate allele  
441 sequences. Counting was done using samtools<sup>37</sup>. Results are listed for the daSNVs in the  
442 respective columns in **Data S3**.

443

#### 444 Therapeutic analysis

445 Several drug databases were used to uncover the therapeutic modulation potential of our  
446 neuropsychiatric-prioritized genes. First, we curated a list of 166 psychiatric drugs with ATC  
447 codes indicated for psychiatric disease. These included 67 antipsychotics, 62 antidepressants, 36  
448 anxiolytic agents, and 1 dopaminergic agent. Additionally, 6798 drugs from The Drug

449 Repurposing Hub (<http://www.broadinstitute.org/repurposing>), where extracted, which contained  
450 374 drugs indicated for neuropsychiatric conditions.

451 Additionally, CMAP<sup>38</sup> (<https://www.broadinstitute.org/connectivity-map-cmap>) was  
452 used to determine the potential for re-purposable drugs to modulate expression of our prioritized  
453 genes. As CMAP contains differential expression activity across multiple cell lines in various  
454 drug treatment conditions, only HEK293T, neural progenitor cells (NPC), and differentiated  
455 neurons (NEU) cells were used in this study. A CMAP level 5 Z-score of 2.5 or -2.5 was used as  
456 a cutoff for upregulated and downregulated genes in a drug perturbation condition, respectively.  
457 Overall, 295 MPRA-prioritized genes were found to be upregulated by psychiatric drugs, and  
458 173 genes were found to be downregulated by psychiatric drugs. Results are found in **Extended**  
459 **Data Fig. 8**, with **table S11** showing a full list of prioritized drug targets.

460

#### 461 Colocalization of GTEx eQTLs and intersection with MPRA results

462 Colocalization analysis was performed by integrating the disease-associated regulatory  
463 risk variants found from MPRA, 114 GWAS and 45 UKBB variant-trait association studies, and  
464 49 GTEx eQTL tissue datasets. Variants were annotated with association summary statistics and  
465 filtered by p-value. GWAS p-values were required to be  $< 5e-8$ . GWAS studies were only  
466 included if they contained at least one daSNVs. Tissue-specific genes were only included if the  
467 eQTL colocalized with at least one variant and passed a tissue-specific FDR cutoff.

468 Colocalization was done via *enloc*<sup>39</sup> (<https://github.com/xqwen/integrative>) and PhenomeXcan<sup>40</sup>  
469 (<https://github.com/hakyimlab/phenomexcan>) to derive significant GWAS-tissue eQTL  
470 colocalizations with at least one MPRA variant genome-wide significant in both study types.

471 Results are found in **table S8**.

472

#### 473 VA cohort analysis of serum magnesium levels in chronic kidney disease

474 The U.S. Department of Veterans Affairs (VA) healthcare system serves over 9 million  
475 veterans at over 1,200 Veterans Health Administration sites of care throughout the United States  
476 and U.S. territories<sup>41</sup>. All VA facilities were included in this analysis, and analysis was inspired  
477 by prior work<sup>42,43</sup>. Patients were examined who'd had a serum magnesium level measured  
478 between January 1, 2021 and December 31, 2021. No patients were excluded. Serum magnesium

479 levels were confirmed in multiple ways to confirm they were a valid test, including using LOINC  
480 codes, and ensured that they were measured in the correct unit (mg/dL). All serum magnesium  
481 levels that were noted by the lab as partially hemolyzed were removed. Ultimately, n=846,795  
482 patients were in the dataset. If a patient had multiple serum magnesium results, the average was  
483 computed and used. Patients' ages and genders were documented and were noted to be  
484 predominately male and between ages 45-85. Eight neuropsychiatric conditions were identified  
485 in the patients using one year of prior ICD-10 codes that were normalized appropriately. These  
486 were Alzheimer's Disease, ADHD, Bipolar Disorder, Generalized Anxiety Disorder, Major  
487 Depressive Disorder, Obsessive Compulsive Disorder, Parkinson's Disease and Schizophrenia.  
488 Chronic kidney disease was included as a control with well documented relationship with  
489 magnesium levels. Relative disease prevalence for serum magnesium levels in the bottom 10th  
490 and upper 10th deciles, as well as bottom and upper of six quantiles. Given that Alcohol Use  
491 Disorder has a well-known effect on Serum Magnesium levels, patients with this condition were  
492 identified for subsequent additional analysis to remove a potential confounder. Significance was  
493 determined by linear regression.

494 All analyses and data visualization were conducted with R and Excel (Microsoft). Results are  
495 shown in **Extended Data Fig. 6**.

496

497

## 498 **Lead Contacts**

499 Further information and requests for resources and reagents should be directed to and will be  
500 fulfilled by Lead Contact Paul A. Khavari ([khavari@stanford.edu](mailto:khavari@stanford.edu)).

501

## 502 **Extended Figure Legends**

503

504 **Fig. S1. MPRA QC Statistics.** (A) Bar chart showing number of reads per MPRA sample in log  
505 scale. Replicates are the number following the "R" prefix. Cell type abbreviations are as follows:  
506 AST= astrocytes; ES=hESC or human embryonic stem cell; A-NPC = anterior neural progenitor  
507 cell; P-NSC = posterior neural progenitor cell; N-DX = induced neuron of day X. Histograms  
508 showing barcodes per sequence in the (B) plasmid (prior to lentiviral infection) and (C) RNA  
509 library (extract post infection). (D) Power analysis for different levels of barcodes power for at 4  
510 different log<sub>2</sub>-fold change thresholds (1.2, 1.5, 2, 3), for a total of 20 variants, simulated 5 times

511 with 5, 10, 20, 50, and 100 barcodes each. **(E)** QQ plots showing the  $-\log_{10}$  empirical vs  
 512 theoretical p-values derived from MPRAalyze for HEK293T as a cell-type example. The red  
 513 line is  $(y=x)$ . **(F)** Histograms showing barcodes per sequence in the RNA library, by cell-type.  
 514 **(G)** Heatmap showing Pearson count correlation between replicates for all cell types, conditions,  
 515 and replicates.

516

517 **Fig. S2. Epigenetics study of the role of transcription regulation in neuropsychiatric**  
 518 **diseases.** **(A)** Heatmap showing TF footprints that are enriched in cell types; color scale is  
 519 normalized count values. **(B)** GO Biological Process dotplot depicting enrichment terms for  
 520 genes closest to ATAC accessible peaks found across ES-derived neuronal differentiation. The  
 521 size of the dot is the number of genes in the GO geneset and the color indicates FDR-adjusted p-  
 522 values. **(C)** Bar chart showing frequency of loop types in promoters and promoter interaction  
 523 anchor loops (putative enhancers) derived from HiChIP data. Type 1: where an enhancer is  
 524 linked to a distal gene and the nearest gene, Type 2: where an enhancer is linked only to a distal  
 525 gene, Type 3: where an enhancer is looped to the closest gene. **(D)** % of P-P (promoter-  
 526 promoter) and P-PIR (promoter to promoter interaction regions) loops per cell type found via  
 527 HiChIP. **(E)** Cumulative distribution curves of distance between loop anchors for the different  
 528 tissues. **(F)** Heatmap (left) showing normalized enrichment scores of motifs broken or gained by  
 529 SNVs associated with different neuropsychiatric diseases derived from MotifBreakR, relative to  
 530 a background of other neuropsychiatric diseases. The \* refers to motifs that are significantly  
 531 broken ( $p$ -value  $< 0.10$ , Fisher's exact test) in daSNVs compared to non-daSNVs for a specific  
 532 disease. The heatmap (right) shows the log TPM expression values of these transcription factors  
 533 in different neuronal cell lines and cell lines. **(G)** Scatterplot comparing log-2 fold changes  
 534 ( $n=206$  variants) for the MPRA dataset ( $y$ -axis) with an external Zhang, et al 2020 allele specific  
 535 open chromatin dataset ( $x$ -axis), with a Pearson correlation of 0.48,  $p$ -value  $1.7 \times 10^{-13}$ .

536

537 **Fig. S3. eGene Network Analysis of additional diseases.** eGene networks for the additional  
 538 neuropsychiatric diseases with at least 20 eGenes (from left to right, top to bottom): MDD, BPD,  
 539 OCD, ADHD, and GAD.

540

541 **Fig. S4. POU5F1/OCT4 Vignette.** **(A)** Tracks for the *POU5F1/OCT4* TF gene, where the peak  
 542 tracks show the logFC change from cell-type specific MPRA for the daSNVs, and the bottom  
 543 loop track shows the looping data for N-D2 cell type. Boxplots depicting ratios of cDNA to  
 544 plasmid counts for reference versus alternate allele for SNVs **(B)** rs28428768, **(C)** rs2442722,  
 545 **(D)** rs35735140, and **(E)** rs3134944, where the center line is the median of each MPRA  
 546 normalized ratio ( $n=10$  genomic instances each); box limits are the upper and lower quartiles,  
 547 whiskers are the 1.5x interquartile range, and points shown are outliers. Ratios are normalized to  
 548 the median reference value for each cell type. Significant associations found by MPRAalyze  
 549 ( $FDR < 0.05$ ) are shown with an asterisk\*.

550

551 **Fig. S5. Association between serum magnesium levels and relative psychiatric disease**  
 552 **incidence in a VA cohort.**

553 **(A)** Relative disease prevalence for serum magnesium levels in the bottom 10th and upper 10th  
 554 deciles. The 10th decile of serum magnesium are values  $< 1.6$  mg/dL and the 90th decile of  
 555 serum magnesium are values  $> 2.4$  mg/dL. \*\* indicates significance between the two proportion  
 556 based on a two-sided 2-proportion z-test FDR-corrected  $p < 0.05$  for a given disease. **(B)** Relative

557 prevalence of diseases by serum magnesium levels in the VA cohort. The above graph includes  
 558 all patients age 45-85, n=846795. The below graph removes all patients who were diagnosed  
 559 with Alcohol Use Disorder, n=618692. Cohort was partitioned by serum magnesium levels into 6  
 560 quantiles and the prevalence of each disease was calculated within the quantile. Relative  
 561 prevalence is calculated as the prevalence normalized to the disease prevalence in the entire  
 562 cohort. Significance is determined by linear regression with the null hypothesis  $\beta = 0$ , with p-  
 563 values  $< 0.10$  showed in solid. Abbreviations of disease are as follows: ADHD=Attention Deficit  
 564 Hyperactivity Disorder, PD=Panic Disorder, GAD=Generalized Anxiety Disorder, BPD=Bipolar  
 565 Disorder, MDD=Major Depressive Disorder, OCD=Obsessive Compulsive Disorder,  
 566 SCZ=Schizophrenia, AD=Alzheimer's Disease, CKD=Chronic Kidney Disease

567  
 568 **Fig. S6 RERE Vignette.** (A) Tracks for gene *RERE*, where the MPRA peak tracks show the  
 569 logFC change from cell-type specific MPRA for the daSNVs, and the bottom ATAC peak show  
 570 accessibility profiles for all cell types. Box-and-whiskers plots depicting ratios of cDNA to  
 571 plasmid counts for reference versus alternate allele for daSNVs (B) rs301806, the SNV of  
 572 interest and (C) rs301807, as comparison, where the center line is the median of each MPRA  
 573 normalized ratio (each point is a genomic instance with at least one count), box limits are the  
 574 upper and lower quartiles, whiskers are the 1.5x interquartile range, and points shown are  
 575 outliers. Ratios are normalized to the median reference value for each cell type. Additionally,  
 576 MotifBreakR results are shown for (D) rs301806 (above) and rs301807 (below), depicting loss of  
 577 RUNX1 motif in rs301806, and no RUNX1 motif present at rs301807 loci. (E) ChIP PCR for the  
 578 transcription factor RUNX1 with n=replicates, \* indicated significance of two-sided paired t-test  
 579 p-value between the reference and alternate allele for the two SNPs.

580  
 581 **Fig. S7. CMAP drug perturbation analysis.** Drug-eGene networks for (A) SCZ, (B) BPD, and  
 582 (C) MDD. Linkages between eGene to drug indicate that the drug significantly upregulated (red)  
 583 or downregulates (blue) the expression of that gene in neuro-relevant cell lines in CMAP. Genes  
 584 (diamonds) are outlined based on the MPRA log fold change direction (red: positive, blue:  
 585 negative). Drugs (ellipses) are color coded by drug type. Drug-gene pairs towards the left side of  
 586 the map indicate the MPRA and expression vectors point in the same direction (putatively side  
 587 effect causing variants); drug-gene pairs towards the right side of the map indicate MPRA and  
 588 expression vectors pointing in the opposite direction (putatively therapeutic effects).

589  
 590 **Fig. S8. Gene concordance for variant annotation approaches.**

591 (A) Distribution of # daSNVs for a GTEx eGene annotations show eGenes are on average, linked  
 592 to five daSNVs. (B) Density plot showing the distribution of daSNV-to-eGene distance with the  
 593 mean depicted as a vertical red dotted line at 20kB. (C) pie chart showing gene annotation  
 594 concordance between the different annotation of daSNVs, indicating almost a half of GWAS  
 595 gene annotations do not match expression or chromatin-based gene linkages. (D) Enrichment  
 596 map made via ClusterProfiler showing GO Molecular Functions enriched in genes linked to  
 597 daSNVs.

598  
 599

600 **Supplementary Tables**

601 Attached as supplementary\_tables.xlsx

602

603 Table S1. Data Summary

604 Summary of the experiments, cells and cell lines used

605

606 See supplementary\_tables.xlsx

607

608 Table S2. Comparison to External Variant Prediction

609 Scoring files for the 2221 MPRA variants for both DeepSea and gkmSVM prediction.

610

611 See supplementary\_tables.xlsx

612

613

614 Table S3. Comparison to External ATAC

615 Comparison of ATAC data to Zhang (PMID: 32732423), Inoue (PMID: 31631012), Song  
616 (PMID: 31367015) data.

617

618 See supplementary\_tables.xlsx

619

620 Table S4 Comparison to External Looping Data

621 Comparison of HiChIP data to Song (PMID: 31367015) pcHiC data via A) anchors and B loops.

622

623 See supplementary\_tables.xlsx

624

625 Table S5. GWAS enrichment odds ratio of daSNVs in cell-type specific ATAC and HiChIP  
626 regions

627 Details of enrichment odds ratio of the daSNVs by disease over differential loop regions that  
628 were filtered by ATAC peaks. Type 2 diabetes mellitus (T2DM) was used as a control and  
629 indicated no enrichment. Enrichment was concentrated to the neuronal stem cells and the  
630 embryonic stem cell neuronal lineages.

631

632 See supplementary\_tables.xlsx

633

634 Table S6. SNP-Motif analysis summary table

635 (A) Detailed MotifBreakR results listing motifs broken and gained and scores associated with  
636 each daSNV, as well as (B) summative analysis stating significant enrichment for motifs gained  
637 or broken (pval\_g or pval\_b, respectively) for each motif in each disease.

638

639 See supplementary\_tables.xlsx

640

641 Table S7. Luciferase assay results

642 daSNVs (n=10 assayed) were run through luciferase assay in SH-SY5Y cells for 4 replicates per  
643 allele per SNP) both in episomal and lentiviral formats. Reference and alternate allele luciferase  
644 signal (firefly to Renilla ratio, normalized to empty vector controls) was reported.

645  
 646  
 647  
 648  
 649  
 650  
 651  
 652  
 653  
 654  
 655  
 656  
 657  
 658  
 659  
 660  
 661  
 662  
 663  
 664  
 665  
 666  
 667  
 668  
 669  
 670  
 671  
 672  
 673  
 674  
 675

See supplementary\_tables.xlsx

Table S8. Colocalization analyses of MPRA hits with GTEx

Colocalization results based on annotation of MPRA variants with GTEx and GWAS summary statistics, following by filtering and colocalization steps.

See supplementary\_tables.xlsx

Table S9. BrainMap (single cell cortical brain data) Annotation for gene linked to daSNVs

See supplementary\_tables.xlsx

Table S10. SCZ disease genes linked to protein coding variants and daSNVs.

List of SCZ-associated genes (n=7) prioritized for protein coding and/or causal variants based on a review of SCZ genetic literature. All genes listed have epigenomic data that links them to SNVs significant in our MPRA study. daSNVs (column 3) are MPRA-significant SNVs that loop to the gene of interest in neural cell types based on HiChIP data. Is eQTL (column 4) is a Boolean indicator of whether or not GTEx, PsychENCODE, and eQTLgen list the daSNVs are an eQTL in brain-relevant tissues (where tissue-specific information is available). SCHEMA's meta analysis p-value, adjusted p-value, protein truncating variants' (PTV) case-control p-value, PTV odds ratio (OR) are shown (columns 5-8). Protein coding mutations (column 9) are missense mutations/PTVs notated within SCHEMA analysis. PMIDs (column 6) are for research articles referencing SCZ GWAS studies, Schizophrenia Exome Sequencing Meta-analysis study (SCHEMA), and various gene-centric papers related to schizophrenia.

Annotations:

note 1: C4A is in the MHC loci and, due to high variability in the region is not included in SCHEMA exome analysis

note 2: XPO7 missense variants/PTVs do not reach high enough allele frequency in cases and/or controls in SCHEMA

| gene           | gene name                                                    | daSNVs                           | is eQTL | Meta pval | Meta p.adjust | CC pval | OR   | Missense Mutations + PTVs                                                                                                        | PMIDs            |
|----------------|--------------------------------------------------------------|----------------------------------|---------|-----------|---------------|---------|------|----------------------------------------------------------------------------------------------------------------------------------|------------------|
| <b>C4A</b>     | complement factor 4                                          | 10 daSNVs                        | y       | Note 1    | Note 1        | Note 1  | 5    | Note 1                                                                                                                           | 26814963         |
| <b>CACNA1G</b> | Calcium channel, voltage-dependent, T type, alpha 1G subunit | rs2428682                        | n       | 4.57e-7   | 1.54e-3       | 3.16e-6 | 4.25 | A2108S, Gly529A, c.6060+2T>C, S818AfsTer21, W925Ter, Q968Ter, Leu1050HfsTer38, W1488Ter, L1685RfsTer27, c.5227-2A>G, c.5925+1G>T | SCHEMA           |
| <b>DAGLA</b>   | Diacylglycerol Lipase Alpha                                  | 9 daSNVs                         | n       | 6.87e-5   | 4.61e-2       | 8.99e-5 | 6.02 | L401VfsTer8, c.1213-2A>G, Q451Ter, Y497Ter, c.1514+1G>T, R547Ter, c.2171+1G>A, A843CfsTer158, A1032GfsTer5                       | SCHEMA           |
| <b>MAGI2</b>   | Membrane Associated Guanylate Kinase                         | rs322004                         | n       | 6.41e-5   | 4.47e-2       | 3.11e-4 | 8.03 | F163LfsTer11, Q1305RfsTer169, R1084Ter, P908LfsTer32, c.2311+2C>A, E531Ter, I473SfsTer4, c.1225+1G>A, E238Ter, W11Ter            | SCHEMA           |
| <b>STAG1</b>   | Cohesin subunit SA-1                                         | rs900947                         | n       | 5.25e-5   | 4.34e-2       | 7.56e-5 | 8.03 | E1235Ter, R1206Ter, L927YfsTer15, I839MfsTer56, R131Ter, R51Ter                                                                  | SCHEMA           |
| <b>SV2A</b>    | synaptic vesicle glycoprotein                                | rs72708145                       | y       | 8.21e-5   | 4.67e-2       | 8.8e-4  | 4.42 | R390Ter, F718CfsTer17, R507Ter, V486SfsTer13, Q476Ter, E138GfsTer15, R67Ter, R43Ter                                              | 31937764, SCHEMA |
| <b>XPO7</b>    | Exportin 7                                                   | rs746011, rs11136093, rs11780207 | n       | 7.18e-9   | 4.34e-5       | 2e-8    | 28.1 | Note 2                                                                                                                           | SCHEMA           |

676

677 Table S11. Psychiatric genes druggability prioritization table

678 This is a prioritization of potential drug targets (8 high, 12 medium, 33 low priority of the 641  
679 possible genes), collated with a combination of various sources of evidence (see README for  
680 more information).

681

682 See supplementary\_tables.xlsx

683

684

685 Table S12. 58 CNS-relevant monogenic diseases and their genes linked by OMIM

686

687 See supplementary\_tables.xlsx, only referenced in methods

688

689 Table S13. RNA-seq TPM values for all tissues

690 RNA-seq data processed in house and from external sources. HEK293s TPM values were  
691 processed from SRR3997504, SRR3997505, SRR3997506, SRR3997507 (Aktas, et al 2017).

692

693 See supplementary\_tables.xlsx, only referenced in methods

694 Table S14. 806 Psychiatric codes in the UK Biobank for which GWAS summary statistics were  
695 extracted

696  
697 See supplementary\_tables.xlsx, only referenced in methods  
698

699 Table S15. Primers

700 See supplementary\_tables.xlsx, only referenced in methods

701  
702

703

## 704 **Supplementary Data Descriptions**

### 705 Data S1. (separate file) LDSC Analysis for Heritability

706 Heatmaps and summary statistics for LDSC analysis of heritability for RNA and ATAC seq  
707 data for GWAS summary statistics as described in methods.

708

### 709 Data S2. (separate file) Literature-derived da-SNV Gene Annotations

710 Literature summary of the 641 da-SNV associated genes, along with PMID and functional  
711 annotations.

712

### 713 Data S3. (separate file) daSNV Summary statistics and annotations table

714 Expanded version of Table 1 all annotations present for all daSNVs. README page includes the  
715 list of annotations included for each daSNV including MPRA summary statistics, druggability  
716 information, motif changes, allele-specific ATAC or HiChIP, ABC predictions, and UK Biobank  
717 phenotypes linked to each daSNV. Also includes annotations for cell types/samples, oligo  
718 sequences for the library and controls used.

719

### 720 Data S4. (separate file) Networks of shared putative pathomechanisms in neuropsychiatric 721 disorders.

722 Full versions of the daSNV (diamond) -gene (ellipses) networks of shared pathomechanisms in  
723 neuropsychiatric disease. Genes are color coded by disease of origin, where the green circles  
724 represent implicated genes shared between multiple diseases. Genes are linked via StringDB.  
725 Networks included are: regulation of cytokine production (GO biological process), sleep issues  
726 (from UK Biobank), anhedonia (UK Biobank), and irritability (UK Biobank).

727

### 728 Data S5. (separate file) MPRA cell-condition-specific summary statistics

729 Summary p-value and log-fold changes for all MPRA tested SNVs calculated using  
730 MPRAalyze.

731

732

733

734

735

736

737 **Bibliography**

- 738 1. Kovalevich, J. & Langford, D. Considerations for the Use of SH-SY5Y Neuroblastoma  
739 Cells in Neurobiology. *Methods Mol. Biol.* **1078**, 9–21 (2013).
- 740 2. Ashuach, T. *et al.* MPRAnalyze: statistical framework for massively parallel reporter  
741 assays. *Genome Biol.* **20**, 183 (2019).
- 742 3. Aktaş, T. *et al.* DHX9 suppresses RNA processing defects originating from the Alu  
743 invasion of the human genome. *Nature* **544**, 115–119 (2017).
- 744 4. Dobin, A. *et al.* STAR: Ultrafast universal RNA-seq aligner. *Bioinformatics* **29**, 15–21  
745 (2013).
- 746 5. Li, B. & Dewey, C. N. RSEM: Accurate transcript quantification from RNA-Seq data with  
747 or without a reference genome. *BMC Bioinformatics* **12**, 1–16 (2011).
- 748 6. Sonesson, C., Love, M. I. & Robinson, M. D. Differential analyses for RNA-seq:  
749 Transcript-level estimates improve gene-level inferences. *F1000Research* **4**, (2016).
- 750 7. Love, M. I., Huber, W. & Anders, S. Moderated estimation of fold change and dispersion  
751 for RNA-seq data with DESeq2. *Genome Biol.* **15**, 550 (2014).
- 752 8. <https://CRAN.R-project.org/package=pheatmap>.
- 753 9. Yu, G., Wang, L. G., Han, Y. & He, Q. Y. ClusterProfiler: An R package for comparing  
754 biological themes among gene clusters. *Omi. A J. Integr. Biol.* **16**, 284–287 (2012).
- 755 10. Ashburner, M. *et al.* Gene ontology: Tool for the unification of biology. *Nature Genetics*  
756 vol. 25 25–29 (2000).
- 757 11. Carbon, S. *et al.* The Gene Ontology resource: Enriching a Gold mine. *Nucleic Acids Res.*  
758 **49**, D325–D334 (2021).
- 759 12. Jassal, B. *et al.* The reactome pathway knowledgebase. *Nucleic Acids Res.* **48**, D498–  
760 D503 (2020).
- 761 13. Subramanian, A. *et al.* Gene set enrichment analysis: A knowledge-based approach for  
762 interpreting genome-wide expression profiles. *Proc. Natl. Acad. Sci. U. S. A.* **102**, 15545–  
763 15550 (2005).
- 764 14. Liberzon, A. *et al.* The Molecular Signatures Database Hallmark Gene Set Collection.  
765 *Cell Syst.* **1**, 417–425 (2015).
- 766 15. Corces, M. R. *et al.* Lineage-specific and single-cell chromatin accessibility charts human  
767 hematopoiesis and leukemia evolution. *Nat. Genet.* **48**, 1193–1203 (2016).
- 768 16. Buenrostro, J. D., Wu, B., Chang, H. Y. & Greenleaf, W. J. ATAC-seq: A Method for  
769 Assaying Chromatin Accessibility Genome-Wide. *Curr. Protoc. Mol. Biol.* **109**, 21.29.1–9  
770 (2015).
- 771 17. Buenrostro, J. D. *et al.* Single-cell chromatin accessibility reveals principles of regulatory  
772 variation. *Nature* **523**, 486–90 (2015).
- 773 18. Langmead, B. & Salzberg, S. L. Fast gapped-read alignment with Bowtie 2. *Nat. Methods*  
774 **9**, 357–359 (2012).
- 775 19. Broad Institute. Picard Tools.
- 776 20. Zhang, Y. *et al.* Model-based analysis of ChIP-Seq (MACS). *Genome Biol.* **9**, 1–9 (2008).
- 777 21. [https://rockefelleruniversity.github.io/RU\\_ATAC\\_Workshop.html](https://rockefelleruniversity.github.io/RU_ATAC_Workshop.html).
- 778 22. Yu, G., Wang, L. G. & He, Q. Y. ChIP seeker: An R/Bioconductor package for ChIP peak  
779 annotation, comparison and visualization. *Bioinformatics* **31**, 2382–2383 (2015).
- 780 23. Mumbach, M. R. *et al.* HiChIP: efficient and sensitive analysis of protein-directed genome  
781 architecture. *Nat. Methods* **13**, 919–922 (2016).

- 782 24. Servant, N. *et al.* HiC-Pro: an optimized and flexible pipeline for Hi-C data processing.  
783 *Genome Biol.* **16**, (2015).
- 784 25. Lareau, C. A. & Aryee, M. J. Hichipper: A preprocessing pipeline for calling DNA loops  
785 from HiChIP data. *Nature Methods* vol. 15 155–156 (2018).
- 786 26. Bhattacharyya, S., Chandra, V., Vijayanand, P. & Ay, F. FitHiChIP: Identification of  
787 significant chromatin contacts from HiChIP data. (2018) doi:10.1101/412833.
- 788 27. Lareau, C. A. & Aryee, M. J. Diffloop: A computational framework for identifying and  
789 analyzing differential DNA loops from sequencing data. *Bioinformatics* **34**, 672–674  
790 (2018).
- 791 28. Frankish, A. *et al.* GENCODE reference annotation for the human and mouse genomes.  
792 *Nucleic Acids Res.* **47**, D766–D773 (2019).
- 793 29. Zerbino, D. R. *et al.* Ensembl 2018. *Nucleic Acids Res.* **46**, D754–D761 (2018).
- 794 30. Xin, J. *et al.* High-performance web services for querying gene and variant annotation.  
795 *Genome Biol.* **17**, 1–7 (2016).
- 796 31. Kulakovskiy, I. V. *et al.* HOCOMOCO: Towards a complete collection of transcription  
797 factor binding models for human and mouse via large-scale ChIP-Seq analysis. *Nucleic*  
798 *Acids Res.* **46**, D252–D259 (2018).
- 799 32. Coetzee, S. G., Coetzee, G. A. & Hazelett, D. J. MotifbreakR: An R/Bioconductor  
800 package for predicting variant effects at transcription factor binding sites. *Bioinformatics*  
801 **31**, 3847–3849 (2015).
- 802 33. Fulco, C. P. *et al.* Activity-by-contact model of enhancer–promoter regulation from  
803 thousands of CRISPR perturbations. *Nature Genetics* vol. 51 1664–1669 (2019).
- 804 34. <https://github.com/broadinstitute/ABC-Enhancer-Gene-Prediction.git>.
- 805 35. Zhang, S. *et al.* *Allele-specific open chromatin in human iPSC neurons elucidates*  
806 *functional disease variants* Downloaded from. <http://science.sciencemag.org/> (2020).
- 807 36. Van der Auwera, G. A. & O’Connor, B. D. *Genomics in the Cloud: Using Docker, GATK,*  
808 *and WDL in Terra.* (O’Reilly Media, 2020).
- 809 37. Li, H. *et al.* The Sequence Alignment/Map format and SAMtools. *Bioinformatics* **25**,  
810 2078–2079 (2009).
- 811 38. Subramanian, A. *et al.* A Next Generation Connectivity Map: L1000 Platform and the  
812 First 1,000,000 Profiles. *Cell* **171**, 1437–1452.e17 (2017).
- 813 39. Wen, X., Pique-Regi, R. & Luca, F. Integrating molecular QTL data into genome-wide  
814 genetic association analysis: Probabilistic assessment of enrichment and colocalization.  
815 *PLOS Genet.* **13**, e1006646 (2017).
- 816 40. Pividori, M. *et al.* PhenomeXcan: Mapping the genome to the phenome through the  
817 transcriptome. *Sci. Adv.* **6**, eaba2083 (2020).
- 818 41. Hussey, P. S. *et al.* Resources and Capabilities of the Department of Veterans Affairs to  
819 Provide Timely and Accessible Care to Veterans. *Rand Heal. Q.* **5**, (2016).
- 820 42. Bayat, V. *et al.* Reduced Mortality With Ondansetron Use in SARS-CoV-2-Infected  
821 Inpatients. *Open forum Infect. Dis.* **8**, (2021).
- 822 43. Holodniy, M. *et al.* Evaluation of Praedico™, A Next Generation Big DataBiosurveillance  
823 Application. *Online J. Public Health Inform.* **7**, (2015).
- 824
- 825
